# Supplementary material for: Augmenting the catalytic activity of CoFe2O4 by substituting rare earth cations into the spinel structure
Source: Royal Society of Chemistry journal article supplement (doi:10.1039/c6ra14325c), 2016-01-01
Supplement: c6ra14325c1.pdf [file c6ra14325c1.pdf]

**Supplementary Information**

**Table S1 XRF elemental analysis of CoRE<sub>x</sub>Fe<sub>2-x</sub>O<sub>4</sub> (RE: Ce, La)**

| Ferrite                                                | Co (wt%) |       | Ce; La (wt%) |       | Fe (wt%) |       | O (wt%) |       |
|--------------------------------------------------------|----------|-------|--------------|-------|----------|-------|---------|-------|
|                                                        | Theo.    | Obs.  | Theo.        | Obs.  | Theo.    | Obs.  | Theo.   | Obs.  |
| <b>CoFe<sub>2</sub>O<sub>4</sub></b>                   | 25.12    | 25.02 | --           | --    | 47.60    | 47.65 | 27.28   | 27.33 |
| <b>CoCe<sub>0.1</sub>Fe<sub>1.9</sub>O<sub>4</sub></b> | 24.25    | 24.32 | 5.77         | 5.81  | 43.65    | 43.59 | 26.33   | 26.28 |
| <b>CoCe<sub>0.2</sub>Fe<sub>1.8</sub>O<sub>4</sub></b> | 23.44    | 23.48 | 11.14        | 11.17 | 39.97    | 39.95 | 25.45   | 25.40 |
| <b>CoCe<sub>0.3</sub>Fe<sub>1.7</sub>O<sub>4</sub></b> | 22.67    | 22.65 | 16.17        | 16.16 | 36.53    | 36.50 | 24.63   | 24.69 |
| <b>CoLa<sub>0.1</sub>Fe<sub>1.9</sub>O<sub>4</sub></b> | 24.26    | 24.29 | 5.72         | 5.70  | 43.67    | 43.62 | 26.35   | 26.39 |
| <b>CoLa<sub>0.2</sub>Fe<sub>1.8</sub>O<sub>4</sub></b> | 23.46    | 23.42 | 11.06        | 11.04 | 40.01    | 40.05 | 25.47   | 25.49 |
| <b>CoLa<sub>0.3</sub>Fe<sub>1.7</sub>O<sub>4</sub></b> | 22.71    | 22.75 | 16.05        | 16.01 | 36.58    | 36.55 | 24.66   | 24.69 |
| <b>CoLa<sub>0.4</sub>Fe<sub>1.6</sub>O<sub>4</sub></b> | 22.00    | 22.05 | 20.74        | 20.71 | 33.36    | 33.39 | 23.90   | 23.85 |
| <b>CoLa<sub>0.5</sub>Fe<sub>1.5</sub>O<sub>4</sub></b> | 21.34    | 21.37 | 25.15        | 25.18 | 30.33    | 30.30 | 23.18   | 23.15 |

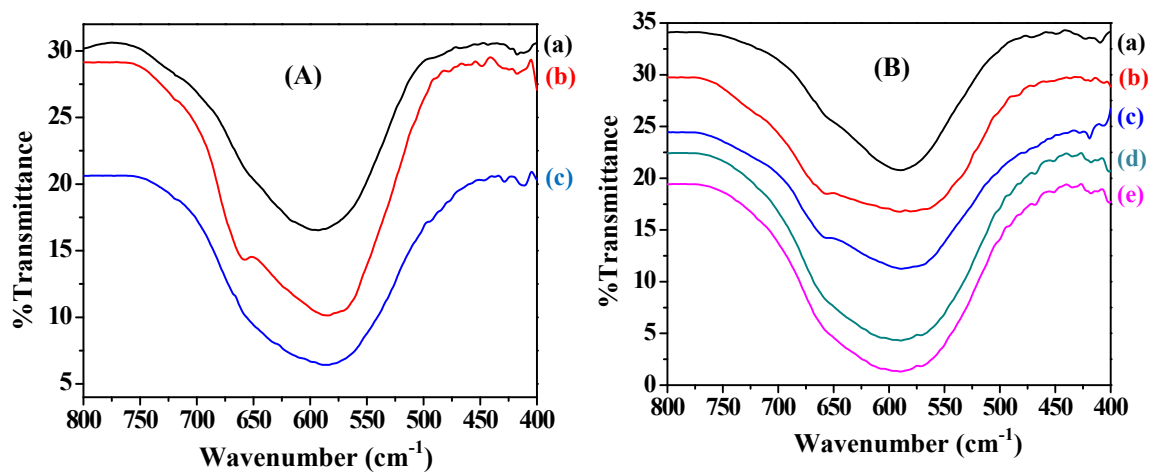

**Fig. S1 FTIR Spectra of (A); (a)  $\text{CoCe}_{0.1}\text{Fe}_{1.9}\text{O}_4$  (b)  $\text{CoCe}_{0.2}\text{Fe}_{1.8}\text{O}_4$  (c)  $\text{CoCe}_{0.3}\text{Fe}_{1.7}\text{O}_4$  and (B); (a)  $\text{CoLa}_{0.1}\text{Fe}_{1.9}\text{O}_4$  (b)  $\text{CoLa}_{0.2}\text{Fe}_{1.8}\text{O}_4$  (c)  $\text{CoLa}_{0.3}\text{Fe}_{1.7}\text{O}_4$  (d)  $\text{CoLa}_{0.4}\text{Fe}_{1.6}\text{O}_4$  and (e)  $\text{CoLa}_{0.5}\text{Fe}_{1.5}\text{O}_4$**

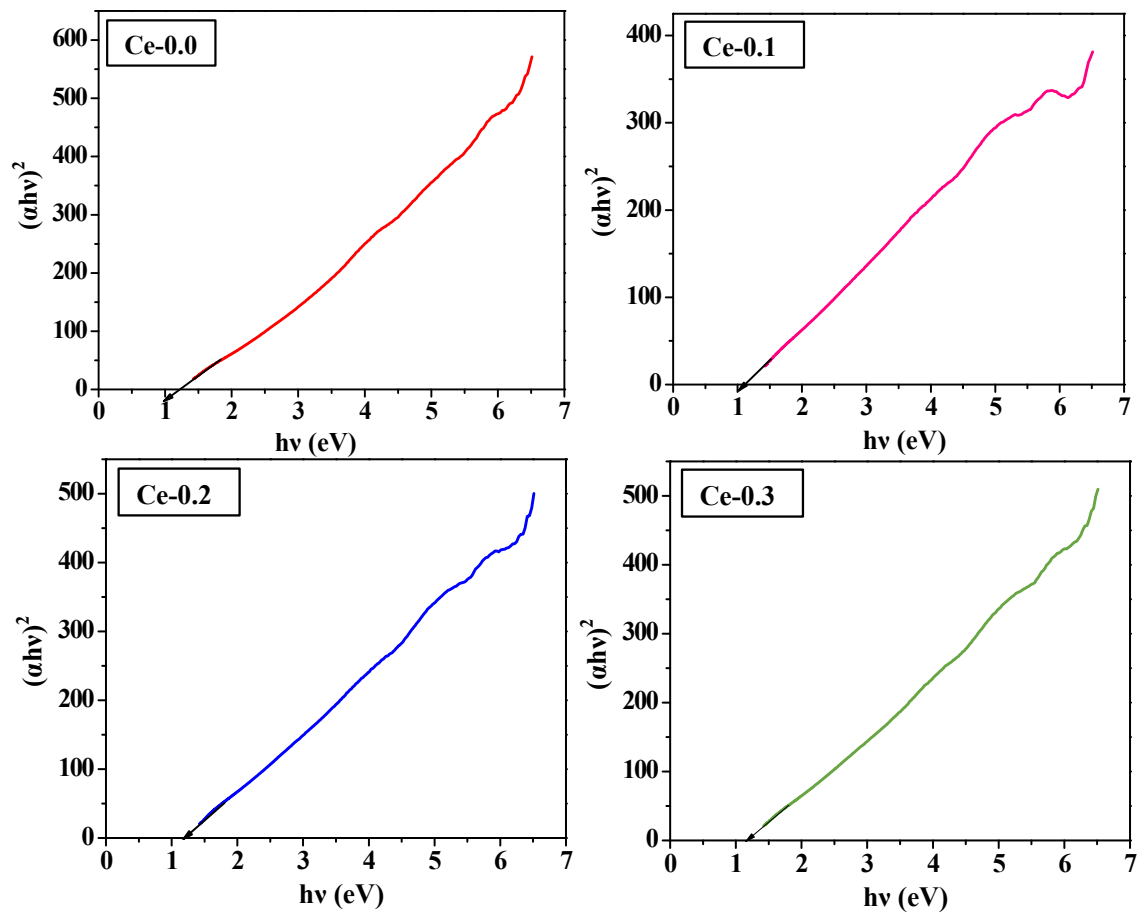

**Fig. S2 Tauc plots of  $\text{CoCe}_x\text{Fe}_{2-x}\text{O}_4$  ( $x = 0.0, 0.1, 0.2, 0.3$ )**

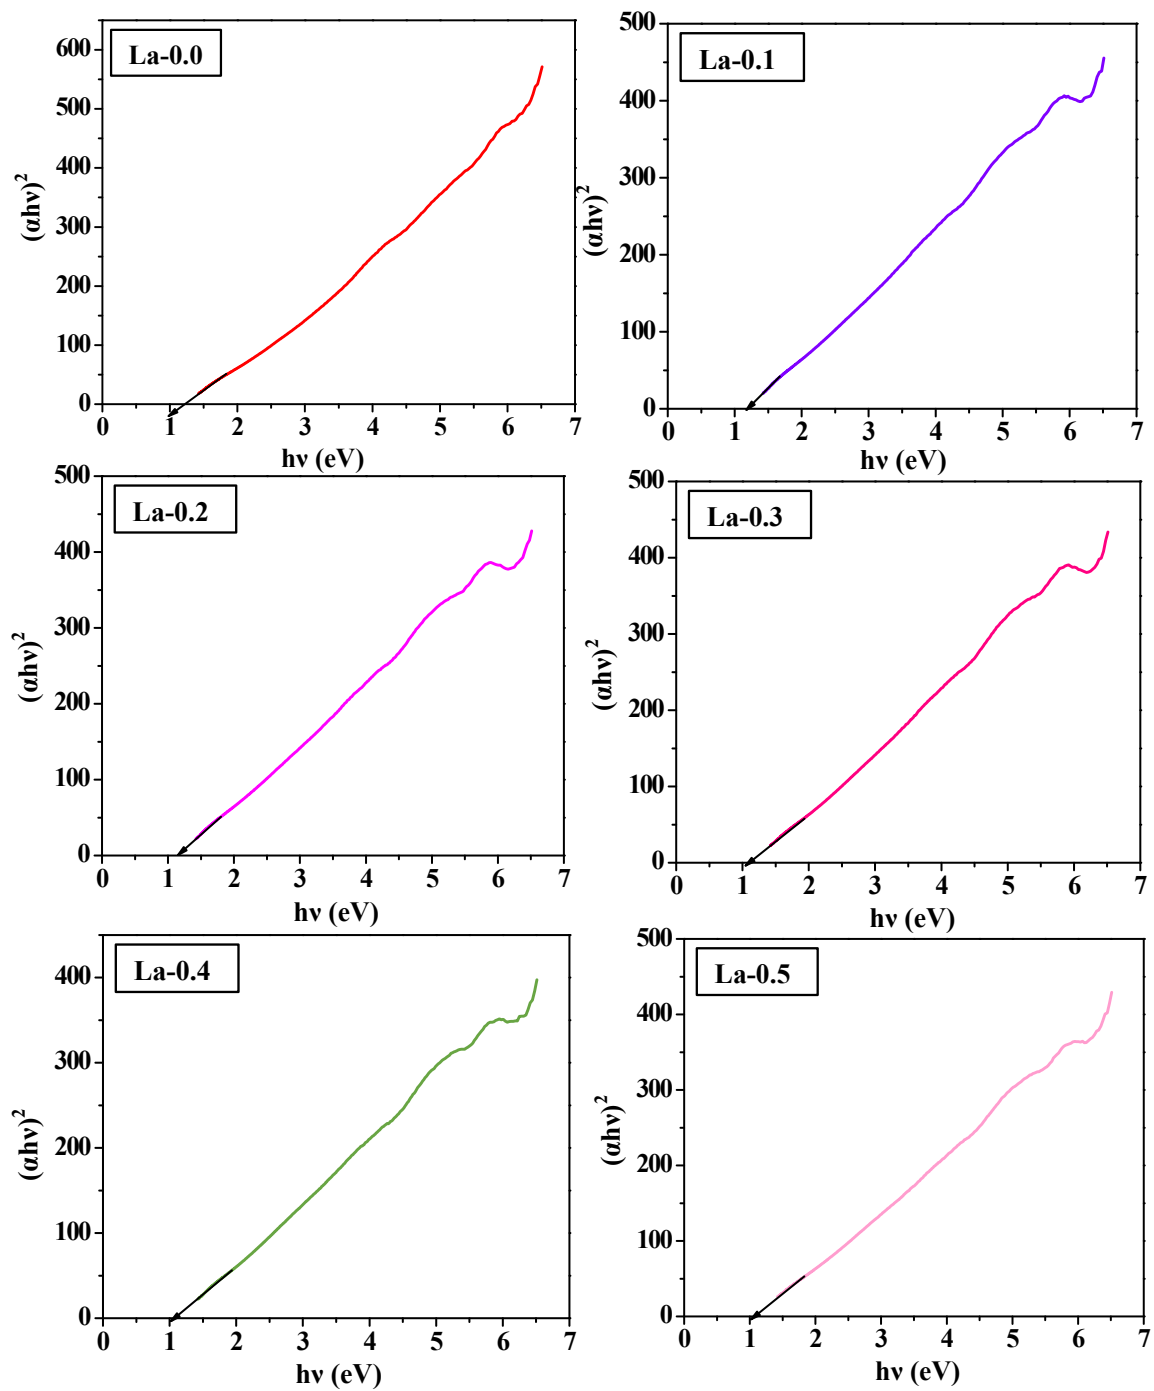

**Fig. S3** Tauc plots of  $\text{CoLa}_x\text{Fe}_{2-x}\text{O}_4$ ;  $x = 0.0, 0.1, 0.2, 0.3, 0.4, 0.5$

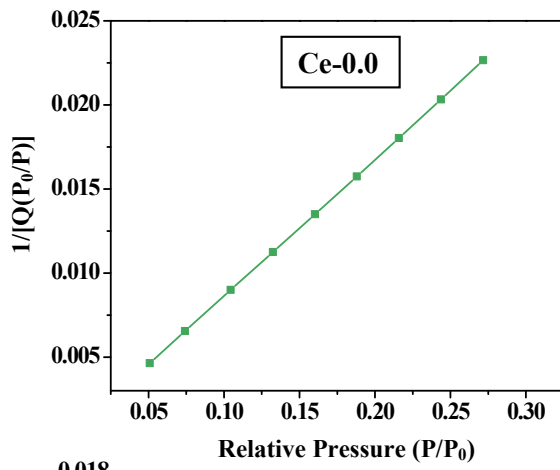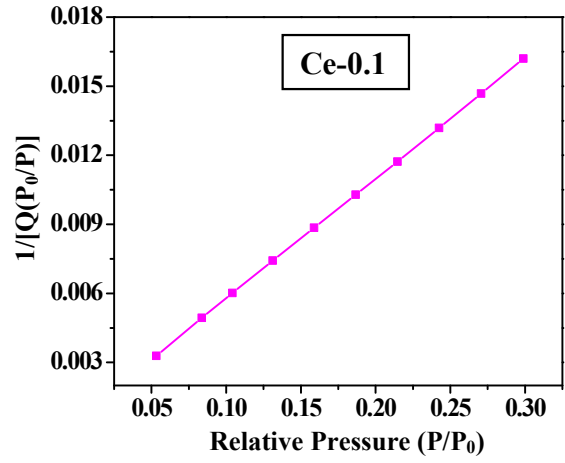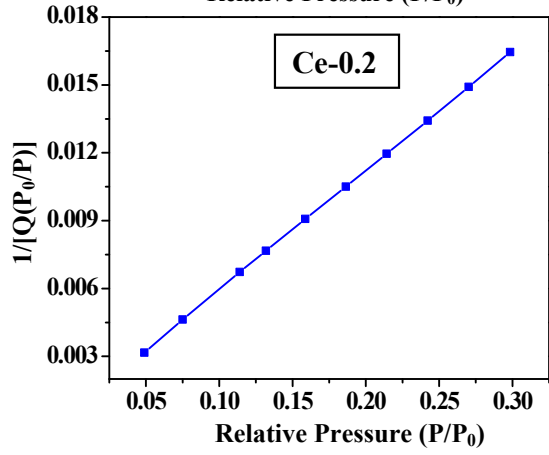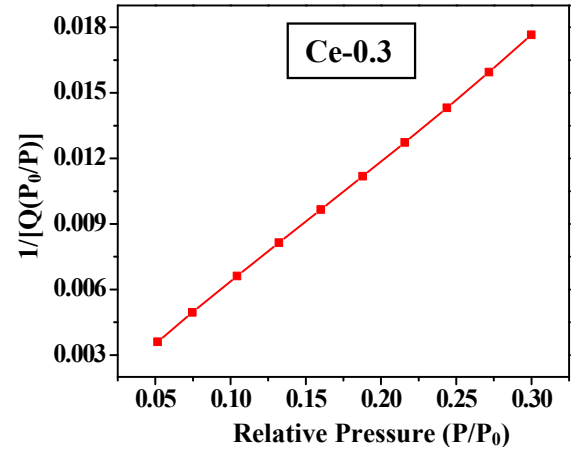

**Fig. S4 BET plots of pure and Ce-doped  $\text{CoFe}_2\text{O}_4$**

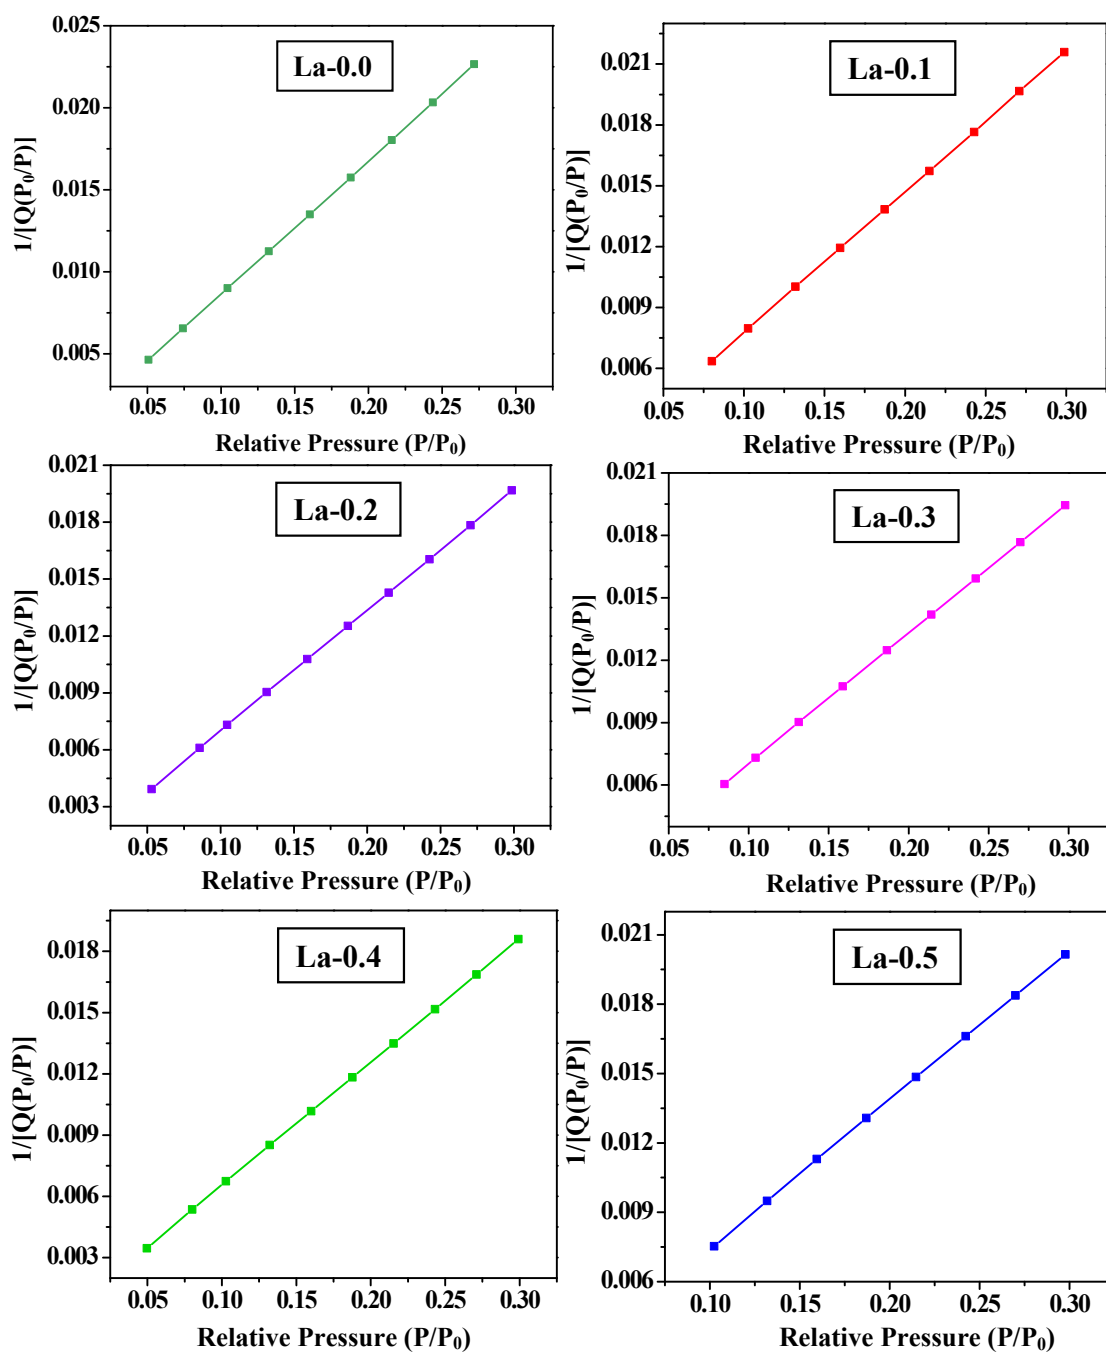

Fig. S5 BET plots of pure and La-doped  $\text{CoFe}_2\text{O}_4$

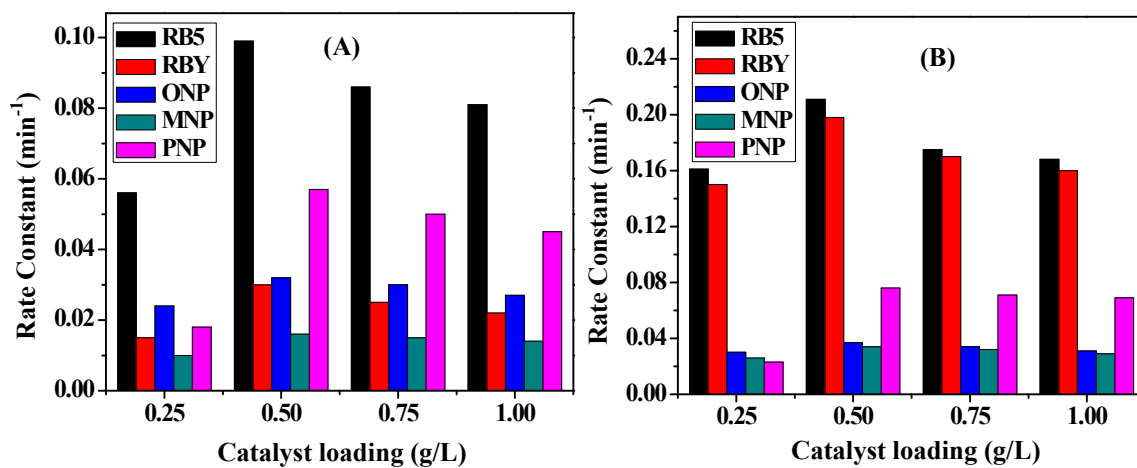

**Fig. S6 Effect of catalyst loading on the photo-degradation of different organic pollutants using (A) HP and (B) PMS as oxidants in the presence of  $\text{CoFe}_2\text{O}_4$**

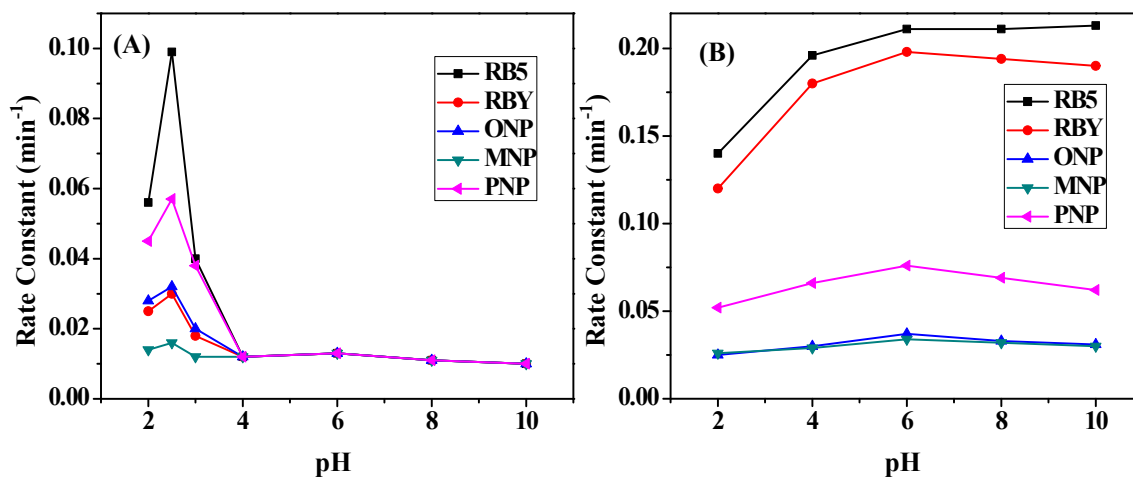

**Fig. S7 Effect of pH on photo-degradation of different pollutants using (A) HP and (B) PMS as oxidants**



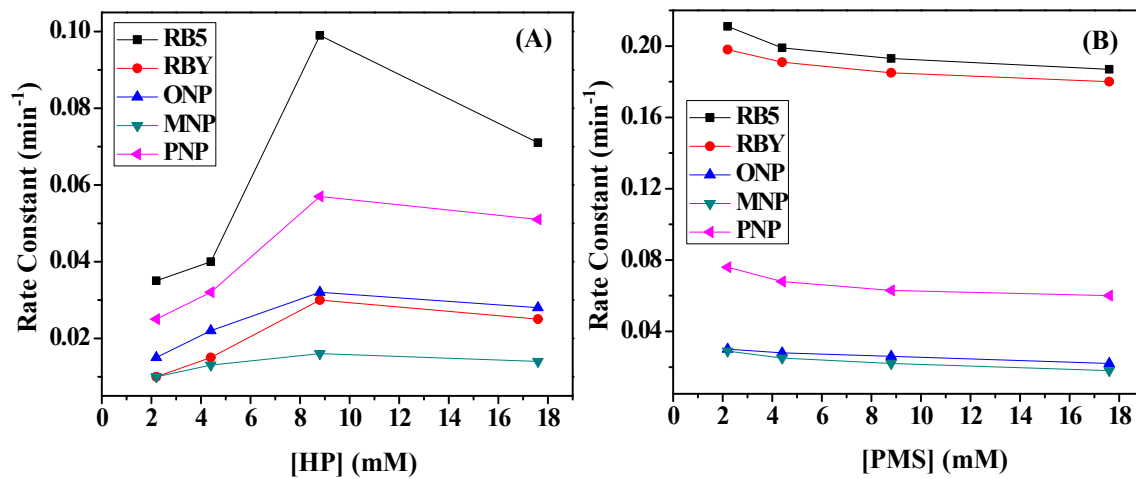

**Fig.S8 Variation of rate constant with [oxidant] in the presence of (A) HP and (B) PMS while using all the probe molecules**
